# Supplementary material for: Land Use Explains the Distribution of Threatened New World Amphibians Better than Climate
Source: PubMed Central journal article supplement (PMC3628793; doi:10.1371/journal.pone.0060742), 2013-04-16
Supplement: pone.0060742.s002.pdf [file pone.0060742.s002.pdf]

**Table S1.** Raw data of richness of amphibian species, endemism and number of threatened amphibian species according to the three different scenarios (urgent, moderate and most inclusive) for each ecoregion, which were used in the analysis. The urgent scenario, containing only CR species and those EW and EX, the moderate scenario containing all EN species and those at threat categories higher than EN (i.e. CR, EW, and EX), and the most inclusive scenario, which included all VU species and those at higher threat categories. The percentage values were calculated in relation to the total ecoregion richness.

| <b>Ecoregion name</b>                      | <b>Richness</b> | <b>Endemism</b> | <b>Urgent scenario</b> | <b>Moderate scenario</b> | <b>Most inclusive scenario</b> |
|--------------------------------------------|-----------------|-----------------|------------------------|--------------------------|--------------------------------|
| Sierra Madre Occidental pine-oak forests   | 39              | 1 (2.6%)        | 0                      | 0                        | 5 (12.8%)                      |
| Sierra Madre Oriental pine-oak forests     | 39              | 3 (7.7%)        | 2 (5.1%)               | 7 (17.9%)                | 13 (33.3%)                     |
| Allegheny Highlands forests                | 27              | 0               | 0                      | 0                        | 0                              |
| Appalachian mixed mesophytic forests       | 58              | 1 (1.7%)        | 0                      | 2 (3.4%)                 | 3 (5.2%)                       |
| Appalachian-Blue Ridge forests             | 67              | 15 (22.4%)      | 0                      | 1 (1.5%)                 | 6 (9%)                         |
| Central U.S. hardwood forests              | 55              | 1 (1.8%)        | 0                      | 0                        | 1 (1.8%)                       |
| East Central Texas forests                 | 29              | 0               | 0                      | 1 (3.4%)                 | 1 (3.4%)                       |
| Eastern forest-boreal transition           | 20              | 0               | 0                      | 0                        | 0                              |
| Eastern Great Lakes lowland forests        | 22              | 0               | 0                      | 0                        | 0                              |
| Gulf of St. Lawrence lowland forests       | 15              | 0               | 0                      | 0                        | 0                              |
| Mississippi lowland forests                | 35              | 0               | 0                      | 0                        | 0                              |
| New England-Acadian forests                | 20              | 0               | 0                      | 0                        | 0                              |
| Northeastern coastal forests               | 29              | 0               | 0                      | 0                        | 0                              |
| Ozark Mountain forests                     | 39              | 3 (7.7%)        | 0                      | 0                        | 1 (2.6%)                       |
| Southeastern mixed forests                 | 63              | 1 (1.6%)        | 0                      | 2 (3.2%)                 | 2 (3.2%)                       |
| Southern Great Lakes forests               | 33              | 0               | 0                      | 0                        | 0                              |
| Upper Midwest forest-savanna transition    | 22              | 0               | 0                      | 0                        | 0                              |
| Western Great Lakes forests                | 22              | 0               | 0                      | 0                        | 0                              |
| Willamette Valley forests                  | 6               | 0               | 0                      | 0                        | 0                              |
| Alberta Mountain forests                   | 4               | 0               | 0                      | 0                        | 0                              |
| Alberta-British Columbia foothills forests | 5               | 0               | 0                      | 0                        | 0                              |
| Arizona Mountains forests                  | 12              | 1 (8.3%)        | 0                      | 0                        | 1 (8.3%)                       |
| Atlantic coastal pine barrens              | 14              | 0               | 0                      | 0                        | 0                              |
| Blue Mountains forests                     | 7               | 0               | 0                      | 0                        | 0                              |
| British Columbia mainland coastal forests  | 11              | 0               | 0                      | 0                        | 0                              |
| Cascade Mountains leeward forests          | 4               | 0               | 0                      | 0                        | 0                              |
| Central and Southern Cascades forests      | 20              | 3 (15%)         | 0                      | 0                        | 4 (20%)                        |

|                                                     |    |           |   |           |           |
|-----------------------------------------------------|----|-----------|---|-----------|-----------|
| Central British Columbia Mountain forests           | 4  | 0         | 0 | 0         | 0         |
| Central Pacific coastal forests                     | 19 | 0         | 0 | 0         | 2 (10.5%) |
| Colorado Rockies forests                            | 7  | 0         | 0 | 0         | 0         |
| Eastern Cascades forests                            | 4  | 0         | 0 | 0         | 1 (25%)   |
| Florida sand pine scrub                             | 16 | 0         | 0 | 0         | 0         |
| Fraser Plateau and Basin complex                    | 5  | 0         | 0 | 0         | 0         |
| Great Basin montane forests                         | 4  | 0         | 0 | 0         | 0         |
| Klamath-Siskiyou forests                            | 15 | 0         | 0 | 0         | 0         |
| Middle Atlantic coastal forests                     | 49 | 2 (4.1%)  | 0 | 0         | 1 (2%)    |
| North Central Rockies forests                       | 9  | 2 (22.2%) | 0 | 0         | 0         |
| Northern California coastal forests                 | 18 | 1 (5.6%)  | 0 | 0         | 1 (5.6%)  |
| Northern Pacific coastal forests                    | 4  | 0         | 0 | 0         | 0         |
| Northern transitional alpine forests                | 5  | 0         | 0 | 0         | 1 (20%)   |
| Okanagan dry forests                                | 8  | 0         | 0 | 0         | 0         |
| Piney Woods forests                                 | 35 | 0         | 0 | 0         | 0         |
| Puget lowland forests                               | 12 | 0         | 0 | 0         | 1 (8.3%)  |
| Queen Charlotte Islands                             | 1  | 0         | 0 | 0         | 0         |
| Sierra Juarez and San Pedro Martir pine-oak forests | 2  | 0         | 0 | 0         | 0         |
| Sierra Nevada forests                               | 13 | 3 (23.1%) | 0 | 2 (15.4%) | 4 (30.8%) |
| South Central Rockies forests                       | 6  | 0         | 0 | 0         | 0         |
| Southeastern conifer forests                        | 53 | 4 (7.5%)  | 0 | 1 (1.9%)  | 4 (7.5%)  |
| Wasatch and Uinta montane forests                   | 7  | 0         | 0 | 0         | 0         |
| Alaska Peninsula montane taiga                      | 1  | 0         | 0 | 0         | 0         |
| Central Canadian Shield forests                     | 12 | 0         | 0 | 0         | 0         |
| Cook Inlet taiga                                    | 1  | 0         | 0 | 0         | 0         |
| Copper Plateau taiga                                | 1  | 0         | 0 | 0         | 0         |
| Eastern Canadian forests                            | 12 | 0         | 0 | 0         | 0         |
| Eastern Canadian Shield taiga                       | 5  | 0         | 0 | 0         | 0         |
| Interior Alaska-Yukon lowland taiga                 | 1  | 0         | 0 | 0         | 0         |
| Mid-Continental Canadian forests                    | 6  | 0         | 0 | 0         | 1 (16.7%) |
| Midwestern Canadian Shield forests                  | 7  | 0         | 0 | 0         | 0         |
| Muskwa-Slave Lake forests                           | 3  | 0         | 0 | 0         | 1 (33.3%) |
| Northern Canadian Shield taiga                      | 3  | 0         | 0 | 0         | 0         |
| Northern Cordillera forests                         | 6  | 0         | 0 | 0         | 1 (16.7%) |

|                                               |    |           |           |           |            |
|-----------------------------------------------|----|-----------|-----------|-----------|------------|
| Northwest Territories taiga                   | 2  | 0         | 0         | 0         | 0          |
| Southern Hudson Bay taiga                     | 7  | 0         | 0         | 0         | 0          |
| Yukon Interior dry forests                    | 4  | 0         | 0         | 0         | 1 (25%)    |
| Western Gulf coastal grasslands               | 32 | 0         | 0         | 2 (6.3%)  | 2 (6.3%)   |
| California Central Valley grasslands          | 6  | 0         | 0         | 0         | 0          |
| Canadian Aspen forests and parklands          | 9  | 0         | 0         | 0         | 0          |
| Central and Southern mixed grasslands         | 19 | 0         | 0         | 0         | 0          |
| Central forest-grasslands transition          | 44 | 0         | 0         | 0         | 0          |
| Central tall grasslands                       | 21 | 0         | 0         | 0         | 0          |
| Edwards Plateau savanna                       | 18 | 2 (11.1%) | 0         | 0         | 2 (11.1%)  |
| Flint Hills tall grasslands                   | 15 | 0         | 0         | 0         | 0          |
| Montana Valley and Foothill grasslands        | 8  | 0         | 0         | 0         | 0          |
| Nebraska Sand Hills mixed grasslands          | 10 | 0         | 0         | 0         | 0          |
| Northern mixed grasslands                     | 15 | 0         | 0         | 0         | 0          |
| Northern short grasslands                     | 9  | 0         | 0         | 0         | 0          |
| Northern tall grasslands                      | 12 | 0         | 0         | 0         | 0          |
| Palouse grasslands                            | 8  | 0         | 0         | 0         | 0          |
| Texas blackland prairies                      | 33 | 3 (9.1%)  | 0         | 1 (3%)    | 3 (9.1%)   |
| Western short grasslands                      | 19 | 0         | 0         | 0         | 0          |
| Alaska-St. Elias Range tundra                 | 2  | 0         | 0         | 0         | 1 (50%)    |
| Beringia lowland tundra                       | 1  | 0         | 0         | 0         | 0          |
| Beringia upland tundra                        | 1  | 0         | 0         | 0         | 0          |
| Interior Yukon-Alaska alpine tundra           | 1  | 0         | 0         | 0         | 0          |
| Pacific Coastal Mountain icefields and tundra | 5  | 0         | 0         | 0         | 1 (20%)    |
| California coastal sage and chaparral         | 15 | 0         | 0         | 0         | 1 (6.7%)   |
| California interior chaparral and woodlands   | 16 | 1 (6.3%)  | 0         | 0         | 2 (12.5%)  |
| California montane chaparral and woodlands    | 14 | 1 (7.1%)  | 0         | 0         | 2 (14.3%)  |
| Baja California desert                        | 8  | 0         | 0         | 0         | 0          |
| Central Mexican matorral                      | 41 | 3 (7.3%)  | 5 (12.2%) | 7 (17.1%) | 13 (31.7%) |
| Chihuahuan desert                             | 34 | 0         | 0         | 0         | 3 (8.8%)   |
| Colorado Plateau shrublands                   | 12 | 0         | 0         | 0         | 0          |
| Great Basin shrub steppe                      | 9  | 0         | 0         | 0         | 1 (11.1%)  |
| Gulf of California xeric scrub                | 2  | 0         | 0         | 0         | 0          |
| Meseta Central matorral                       | 25 | 0         | 1 (4%)    | 4 (16%)   | 5 (20%)    |

|                                         |     |            |            |            |            |
|-----------------------------------------|-----|------------|------------|------------|------------|
| Mojave desert                           | 8   | 2 (25%)    | 0          | 2 (25%)    | 2 (25%)    |
| Snake-Columbia shrub steppe             | 8   | 0          | 0          | 0          | 0          |
| Sonoran desert                          | 27  | 2 (7.4%)   | 0          | 0          | 0          |
| Tamaulipan matorral                     | 17  | 0          | 1 (5.9%)   | 2 (11.8%)  | 3 (17.6%)  |
| Tamaulipan mezquital                    | 29  | 0          | 0          | 1 (3.4%)   | 2 (6.9%)   |
| Wyoming Basin shrub steppe              | 6   | 0          | 0          | 0          | 0          |
| Araucaria moist forests                 | 172 | 1 (0.6%)   | 3 (1.7%)   | 5 (2.9%)   | 6 (3.5%)   |
| Atlantic Coast restingas                | 188 | 0          | 1 (0.5%)   | 2 (1.1%)   | 4 (2.1%)   |
| Bahia coastal forests                   | 95  | 0          | 0          | 0          | 3 (3.2%)   |
| Bahia interior forests                  | 145 | 1 (0.7%)   | 1 (0.7%)   | 2 (1.4%)   | 5 (3.4%)   |
| Bolivian Yungas                         | 53  | 24 (45.3%) | 3 (5.7%)   | 7 (13.2%)  | 12 (22.6%) |
| Caatinga Enclaves moist forests         | 20  | 0          | 0          | 0          | 0          |
| Caqueta moist forests                   | 75  | 2 (2.7%)   | 1 (1.3%)   | 1 (1.3%)   | 1 (1.3%)   |
| Catatumbo moist forests                 | 3   | 0          | 0          | 0          | 0          |
| Cauca Valley montane forests            | 58  | 20 (34.5%) | 6 (10.3%)  | 14 (24.1%) | 22 (37.9%) |
| Central American Atlantic moist forests | 35  | 0          | 0          | 2 (5.7%)   | 3 (8.6%)   |
| Central American montane forests        | 72  | 0          | 9 (12.5%)  | 28 (38.9%) | 41 (56.9%) |
| Chiapas montane forests                 | 46  | 1 (2.2%)   | 8 (17.4%)  | 12 (26.1%) | 20 (43.5%) |
| Chimalapas montane forests              | 19  | 2 (10.5%)  | 3 (15.8%)  | 5 (26.3%)  | 7 (36.8%)  |
| Chocó-Darién moist forests              | 137 | 24 (17.5%) | 5 (3.6%)   | 9 (6.6%)   | 23 (16.8%) |
| Cordillera La Costa montane forests     | 40  | 26 (65%)   | 2 (5%)     | 8 (20%)    | 13 (32.5%) |
| Cordillera Oriental montane forests     | 82  | 25 (30.5%) | 2 (2.4%)   | 11 (13.4%) | 27 (32.9%) |
| Costa Rican seasonal moist forests      | 40  | 0          | 0          | 3 (7.5%)   | 4 (10%)    |
| Cuban moist forests                     | 37  | 2 (5.4%)   | 6 (16.2%)  | 21 (56.8%) | 28 (75.7%) |
| Eastern Cordillera real montane forests | 194 | 74 (38.1%) | 14 (7.2%)  | 59 (30.4%) | 84 (43.3%) |
| Eastern Panamanian montane forests      | 30  | 1 (3.3%)   | 0          | 0          | 2 (6.7%)   |
| Guianan Highlands moist forests         | 98  | 17 (17.3%) | 1 (1%)     | 1 (1%)     | 4 (4.1%)   |
| Guianan moist forests                   | 126 | 17 (13.5%) | 0          | 0          | 3 (2.4%)   |
| Gurupa varzea                           | 31  | 0          | 0          | 0          | 1 (3.2%)   |
| Hispaniolan moist forests               | 47  | 14 (29.8%) | 23 (48.9%) | 34 (72.3%) | 40 (85.1%) |
| Iquitos varzea                          | 127 | 1 (0.8%)   | 0          | 1 (0.8%)   | 2 (1.6%)   |
| Isthmian-Atlantic moist forests         | 116 | 8 (6.9%)   | 4 (3.4%)   | 14 (12.1%) | 26 (22.4%) |
| Isthmian-Pacific moist forests          | 97  | 4 (4.1%)   | 5 (5.2%)   | 9 (9.3%)   | 18 (18.6%) |
| Jamaican moist forests                  | 19  | 7 (36.8%)  | 6 (31.6%)  | 14 (73.7%) | 16 (84.2%) |

|                                       |     |             |            |            |             |
|---------------------------------------|-----|-------------|------------|------------|-------------|
| Japurá-Solimoes-Negro moist forests   | 92  | 1 (1.1%)    | 0          | 0          | 1 (1.1%)    |
| Juruá-Purus moist forests             | 63  | 0           | 0          | 0          | 0           |
| Leeward Islands moist forests         | 11  | 0           | 1 (9.1%)   | 5 (45.5%)  | 5 (45.5%)   |
| Madeira-Tapajós moist forests         | 50  | 0           | 0          | 0          | 0           |
| Magdalena Valley montane forests      | 105 | 52 (49.5%)  | 12 (11.4%) | 34 (32.4%) | 57 (54.3%)  |
| Magdalena-Urabá moist forests         | 46  | 3 (6.5%)    | 0          | 0          | 1 (2.2%)    |
| Marajá varzea                         | 53  | 0           | 0          | 0          | 1 (1.9%)    |
| Maranhão Babaçu forests               | 26  | 0           | 0          | 0          | 0           |
| Mato Grosso seasonal forests          | 49  | 0           | 0          | 0          | 0           |
| Monte Alegre varzea                   | 53  | 0           | 0          | 0          | 0           |
| Napo moist forests                    | 162 | 22 (13.6%)  | 0          | 3 (1.9%)   | 6 (3.7%)    |
| Negro-Branco moist forests            | 67  | 3 (4.5%)    | 0          | 0          | 1 (1.5%)    |
| Northeastern Brazil restingas         | 15  | 0           | 0          | 0          | 0           |
| Northwestern Andean montane forests   | 213 | 111 (52.1%) | 21 (9.9%)  | 59 (27.7%) | 100 (46.9%) |
| Oaxacan montane forests               | 51  | 4 (7.8%)    | 8 (15.7%)  | 19 (37.3%) | 24 (47.1%)  |
| Orinoco Delta swamp forests           | 10  | 0           | 0          | 0          | 0           |
| Pantanos de Centla                    | 18  | 0           | 0          | 0          | 0           |
| Guianan freshwater swamp forests      | 33  | 0           | 0          | 0          | 0           |
| Alto Parana Atlantic forests          | 285 | 0           | 6 (2.1%)   | 10 (3.5%)  | 12 (4.2%)   |
| Pernambuco coastal forests            | 35  | 0           | 0          | 0          | 1 (2.9%)    |
| Pernambuco interior forests           | 37  | 0           | 0          | 0          | 1 (2.7%)    |
| Peruvian Yungas                       | 116 | 64 (55.2%)  | 8 (6.9%)   | 24 (20.7%) | 32 (27.6%)  |
| Petén-Veracruz moist forests          | 101 | 9 (8.9%)    | 13 (12.9%) | 31 (30.7%) | 45 (44.6%)  |
| Puerto Rican moist forests            | 17  | 11 (64.7%)  | 6 (35.3%)  | 11 (64.7%) | 11 (64.7%)  |
| Purus varzea                          | 117 | 0           | 0          | 1 (0.9%)   | 2 (1.7%)    |
| Purus-Madeira moist forests           | 64  | 0           | 0          | 0          | 0           |
| Rio Negro campinarana                 | 65  | 0           | 0          | 0          | 1 (1.5%)    |
| Santa Marta montane forests           | 18  | 14 (77.8%)  | 5 (27.8%)  | 8 (44.4%)  | 9 (50%)     |
| Serra do Mar coastal forests          | 233 | 4 (1.7%)    | 5 (2.1%)   | 6 (2.6%)   | 8 (3.4%)    |
| Sierra de los Tuxtlas                 | 40  | 5 (12.5%)   | 7 (17.5%)  | 9 (22.5%)  | 12 (30%)    |
| Sierra Madre de Chiapas moist forests | 44  | 2 (4.5%)    | 2 (4.5%)   | 9 (20.5%)  | 16 (36.4%)  |
| Solimões-Japurá moist forests         | 131 | 0           | 0          | 1 (0.8%)   | 2 (1.5%)    |
| South Florida rocklands               | 15  | 0           | 0          | 0          | 0           |
| Southern Andean Yungas                | 49  | 4 (8.2%)    | 0          | 6 (12.2%)  | 11 (22.4%)  |

|                                        |     |            |            |            |            |
|----------------------------------------|-----|------------|------------|------------|------------|
| Southwest Amazon moist forests         | 168 | 14 (8.3%)  | 1 (0.6%)   | 2 (1.2%)   | 3 (1.8%)   |
| Talamancan montane forests             | 122 | 37 (30.3%) | 22 (18%)   | 40 (32.8%) | 53 (43.4%) |
| Tapajós-Xingu moist forests            | 53  | 0          | 0          | 0          | 1 (1.9%)   |
| Pantepui                               | 52  | 28 (53.8%) | 0          | 0          | 4 (7.7%)   |
| Tocantins/Pindare moist forests        | 34  | 0          | 0          | 0          | 0          |
| Trinidad and Tobago moist forests      | 2   | 0          | 0          | 1 (50%)    | 1 (50%)    |
| Uatuma-Trombetas moist forests         | 89  | 0          | 0          | 0          | 1 (1.1%)   |
| Ucayali moist forests                  | 122 | 6 (4.9%)   | 0          | 1 (0.8%)   | 4 (3.3%)   |
| Venezuelan Andes montane forests       | 55  | 35 (63.6%) | 10 (18.2%) | 26 (47.3%) | 33 (60%)   |
| Veracruz moist forests                 | 58  | 4 (6.9%)   | 3 (5.2%)   | 13 (22.4%) | 24 (41.4%) |
| Veracruz montane forests               | 27  | 2 (7.4%)   | 2 (7.4%)   | 6 (22.2%)  | 11 (40.7%) |
| Western Ecuador moist forests          | 85  | 10 (11.8%) | 4 (4.7%)   | 11 (12.9%) | 24 (28.2%) |
| Windward Islands moist forests         | 6   | 0          | 1 (16.7%)  | 2 (33.3%)  | 2 (33.3%)  |
| Xingu-Tocantins-Araguaia moist forests | 48  | 0          | 0          | 0          | 1 (2.1%)   |
| Yucatán moist forests                  | 35  | 0          | 0          | 1 (2.9%)   | 3 (8.6%)   |
| Apure-Villavicencio dry forests        | 47  | 3 (6.4%)   | 1 (2.1%)   | 2 (4.3%)   | 2 (4.3%)   |
| Atlantic dry forests                   | 41  | 0          | 0          | 0          | 0          |
| Bajío dry forests                      | 33  | 0          | 0          | 3 (9.1%)   | 5 (15.2%)  |
| Balsas dry forests                     | 43  | 1 (2.3%)   | 2 (4.7%)   | 4 (9.3%)   | 12 (27.9%) |
| Bolivian montane dry forests           | 25  | 2 (8%)     | 0          | 1 (4%)     | 1 (4%)     |
| Cauca Valley dry forests               | 6   | 0          | 0          | 0          | 0          |
| Central American dry forests           | 36  | 0          | 2 (5.6%)   | 2 (5.6%)   | 3 (8.3%)   |
| Dry Chaco                              | 57  | 4 (7%)     | 1 (1.8%)   | 3 (5.3%)   | 3 (5.3%)   |
| Chiapas Depression dry forests         | 33  | 0          | 2 (6.1%)   | 4 (12.1%)  | 8 (24.2%)  |
| Chiquitano dry forests                 | 54  | 0          | 0          | 0          | 0          |
| Cuban dry forests                      | 32  | 0          | 4 (12.5%)  | 16 (50%)   | 23 (71.9%) |
| Ecuadorian dry forests                 | 13  | 0          | 0          | 0          | 1 (7.7%)   |
| Hispaniolan dry forests                | 29  | 4 (13.8%)  | 13 (44.8%) | 20 (69%)   | 24 (82.8%) |
| Jalisco dry forests                    | 25  | 1 (4%)     | 1 (4%)     | 2 (8%)     | 3 (12%)    |
| Jamaican dry forests                   | 13  | 0          | 3 (23.1%)  | 9 (69.2%)  | 10 (76.9%) |
| Lara-Falcón dry forests                | 10  | 0          | 0          | 0          | 0          |
| Lesser Antillean dry forests           | 6   | 0          | 1 (16.7%)  | 2 (33.3%)  | 2 (33.3%)  |
| Magdalena Valley dry forests           | 19  | 0          | 0          | 0          | 0          |
| Maracaibo dry forests                  | 8   | 0          | 0          | 0          | 0          |

|                                              |     |            |            |            |            |
|----------------------------------------------|-----|------------|------------|------------|------------|
| Marañón dry forests                          | 4   | 0          | 1 (25%)    | 1 (25%)    | 1 (25%)    |
| Panamanian dry forests                       | 22  | 0          | 0          | 0          | 1 (4.5%)   |
| Puerto Rican dry forests                     | 6   | 0          | 1 (16.7%)  | 2 (33.3%)  | 2 (33.3%)  |
| Sierra de la Laguna dry forests              | 2   | 0          | 0          | 0          | 0          |
| Sinaloan dry forests                         | 38  | 1 (2.6%)   | 1 (2.6%)   | 2 (5.3%)   | 7 (18.4%)  |
| Sin· Valley dry forests                      | 42  | 1 (2.4%)   | 1 (2.4%)   | 8 (19%)    | 12 (28.6%) |
| Southern Pacific dry forests                 | 68  | 5 (7.4%)   | 9 (13.2%)  | 16 (23.5%) | 26 (38.2%) |
| Tumbes-Piura dry forests                     | 11  | 2 (18.2%)  | 0          | 1 (9.1%)   | 2 (18.2%)  |
| Veracruz dry forests                         | 26  | 0          | 0          | 2 (7.7%)   | 4 (15.4%)  |
| Yucatán dry forests                          | 19  | 1 (5.3%)   | 0          | 0          | 0          |
| Bahamian pine mosaic                         | 2   | 0          | 0          | 0          | 0          |
| Belizian pine forests                        | 14  | 0          | 0          | 0          | 0          |
| Central American pine-oak forests            | 103 | 2 (1.9%)   | 15 (14.6%) | 37 (35.9%) | 52 (50.5%) |
| Cuban pine forests                           | 23  | 0          | 1 (4.3%)   | 7 (30.4%)  | 14 (60.9%) |
| Hispaniolan pine forests                     | 30  | 6 (20%)    | 11 (36.7%) | 20 (66.7%) | 24 (80%)   |
| Sierra de la Laguna pine-oak forests         | 3   | 0          | 0          | 0          | 0          |
| Sierra Madre del Sur pine-oak forests        | 13  | 0          | 0          | 0          | 0          |
| Trans-Mexican Volcanic Belt pine-oak forests | 78  | 8 (10.3%)  | 9 (11.5%)  | 25 (32.1%) | 33 (42.3%) |
| Magellanic subpolar forests                  | 12  | 2 (16.7%)  | 0          | 0          | 1 (8.3%)   |
| Valdivian temperate forests                  | 38  | 20 (52.6%) | 6 (15.8%)  | 10 (26.3%) | 17 (44.7%) |
| Beni savanna                                 | 29  | 0          | 0          | 0          | 0          |
| Campos Rupestres montane savanna             | 113 | 0          | 2 (1.8%)   | 2 (1.8%)   | 3 (2.7%)   |
| Cerrado                                      | 199 | 4 (2%)     | 4 (2%)     | 4 (2%)     | 5 (2.5%)   |
| Guianan savanna                              | 91  | 5 (5.5%)   | 0          | 0          | 2 (2.2%)   |
| Humid Chaco                                  | 60  | 1 (1.7%)   | 1 (1.7%)   | 2 (3.3%)   | 2 (3.3%)   |
| Llanos                                       | 39  | 1 (2.6%)   | 0          | 0          | 0          |
| Uruguayan savanna                            | 113 | 6 (5.3%)   | 1 (0.9%)   | 3 (2.7%)   | 6 (5.3%)   |
| Espinal                                      | 29  | 1 (3.4%)   | 1 (3.4%)   | 1 (3.4%)   | 2 (6.9%)   |
| Low Monte                                    | 10  | 0          | 1 (10%)    | 3 (30%)    | 4 (40%)    |
| Humid Pampas                                 | 36  | 0          | 1 (2.8%)   | 2 (5.6%)   | 2 (5.6%)   |
| Patagonian steppe                            | 13  | 4 (30.8%)  | 0          | 4 (30.8%)  | 6 (46.2%)  |
| Cuban wetlands                               | 16  | 0          | 0          | 3 (18.8%)  | 8 (50%)    |
| Enriquillo wetlands                          | 9   | 0          | 0          | 2 (22.2%)  | 5 (55.6%)  |
| Everglades                                   | 19  | 0          | 0          | 0          | 0          |

|                                             |    |            |            |            |            |
|---------------------------------------------|----|------------|------------|------------|------------|
| Guayaquil flooded grasslands                | 8  | 0          | 0          | 0          | 1 (12.5%)  |
| Pantanal                                    | 54 | 0          | 0          | 0          | 0          |
| Paraná flooded savanna                      | 44 | 0          | 1 (2.3%)   | 2 (4.5%)   | 2 (4.5%)   |
| Southern Cone Mesopotamian savanna          | 25 | 0          | 1 (4%)     | 1 (4%)     | 1 (4%)     |
| Central Andean dry puna                     | 14 | 5 (35.7%)  | 3 (21.4%)  | 5 (35.7%)  | 8 (57.1%)  |
| Central Andean puna                         | 24 | 4 (16.7%)  | 1 (4.2%)   | 4 (16.7%)  | 9 (37.5%)  |
| Central Andean wet puna                     | 21 | 11 (52.4%) | 3 (14.3%)  | 7 (33.3%)  | 10 (47.6%) |
| Cordillera Central páramo                   | 14 | 7 (50%)    | 3 (21.4%)  | 7 (50%)    | 7 (50%)    |
| Cordillera de Merida páramo                 | 3  | 1 (33.3%)  | 2 (66.7%)  | 2 (66.7%)  | 2 (66.7%)  |
| Northern Andean páramo                      | 89 | 37 (41.6%) | 14 (15.7%) | 40 (44.9%) | 51 (57.3%) |
| Santa Marta páramo                          | 2  | 0          | 2 (100%)   | 2 (100%)   | 2 (100%)   |
| Southern Andean steppe                      | 14 | 4 (28.6%)  | 2 (14.3%)  | 3 (21.4%)  | 4 (28.6%)  |
| High Monte                                  | 11 | 1 (9.1%)   | 0          | 2 (18.2%)  | 4 (36.4%)  |
| Chilean matorral                            | 5  | 1 (20%)    | 0          | 0          | 0          |
| Araya and Paria xeric scrub                 | 1  | 0          | 0          | 0          | 0          |
| Caatinga                                    | 49 | 0          | 0          | 0          | 1 (2%)     |
| Caribbean shrublands                        | 14 | 0          | 1 (7.1%)   | 4 (28.6%)  | 6 (42.9%)  |
| Cuban cactus scrub                          | 24 | 0          | 1 (4.2%)   | 12 (50%)   | 16 (66.7%) |
| Guajira-Barranquilla xeric scrub            | 8  | 1 (12.5%)  | 0          | 0          | 0          |
| La Costa xeric shrublands                   | 12 | 0          | 0          | 0          | 0          |
| Motagua Valley thornscrub                   | 23 | 0          | 0          | 0          | 0          |
| Paraguana xeric scrub                       | 2  | 0          | 0          | 0          | 0          |
| San Lucan xeric scrub                       | 2  | 0          | 0          | 0          | 0          |
| Sechura desert                              | 7  | 3 (42.9%)  | 0          | 0          | 2 (28.6%)  |
| Tehuacán Valley matorral                    | 29 | 3 (10.3%)  | 2 (6.9%)   | 7 (24.1%)  | 9 (31%)    |
| Amazon-Orinoco-Southern Caribbean mangroves | 14 | 0          | 0          | 1 (7.1%)   | 2 (14.3%)  |
| Bahamian-Antillean mangroves                | 58 | 0          | 8 (13.8%)  | 25 (43.1%) | 33 (56.9%) |
| Mesoamerican Gulf-Caribbean mangroves       | 52 | 0          | 0          | 0          | 5 (9.6%)   |
| South American Pacific mangroves            | 34 | 0          | 0          | 0          | 2 (5.9%)   |
| Southern Atlantic mangroves                 | 59 | 0          | 1 (1.7%)   | 1 (1.7%)   | 1 (1.7%)   |
| Southern Mesoamerican Pacific mangroves     | 54 | 0          | 0          | 0          | 3 (5.6%)   |
